# Supplementary material
Source: MDPI journal article supplement (https://www.mdpi.com/2072-4292/10/3/424)
Supplement: s1 [file s1]

Article

# Satellite Leaf Area Index: global scale analysis of the tendencies per vegetation type over the last 17 years

## Supplementary material

Simon Munier <sup>1,\*</sup>, Dominique Carrer <sup>1</sup>, Carole Planque <sup>1</sup>, Fernando Camacho <sup>2</sup>, Clément Albergel <sup>1</sup> and Jean-Christophe Calvet <sup>1</sup>

<sup>1</sup> CNRM, UMR 3589, Météo France, 42 av Gaspard Coriolis, 31000 Toulouse, France.

<sup>2</sup> EOLAB, Parc Científic Universitat de València, C/ Catedrático Agustín Escardino, 9, E-46980 Paterna (Valencia), Spain

\* Correspondence: [simon.munier@meteo.fr](mailto:simon.munier@meteo.fr)

Academic Editor: name

Version March 2, 2018 submitted to Remote Sens.

### 1 S1. Cover fraction of each vegetation type

2 Figures [S1-S2](#) show the fraction of the six vegetation types: broadleaf forests, coniferous forests,  
3 evergreen forests, summer crops, winter crops and grasslands. Cover fractions are extracted from the  
4 ECOCLIMAP-II land cover database [1].

5

- 6 1. Faroux, S., Kaptué Tchuenté, A. T., Roujean, J. L., Masson, V., Martin, E., and Le Moigne, P. (2013).  
7 ECOCLIMAP-II/Europe: a twofold database of ecosystems and surface parameters at 1 km resolution  
8 based on satellite information for use in land surface, meteorological and climate models. *Geoscientific*  
9 *Model Development*, 6(2), 563–582.

10 © 2018 by the authors. Submitted to *Remote Sens.* for possible open access publication  
11 under the terms and conditions of the Creative Commons Attribution (CC BY) license  
12 (<http://creativecommons.org/licenses/by/4.0/>).

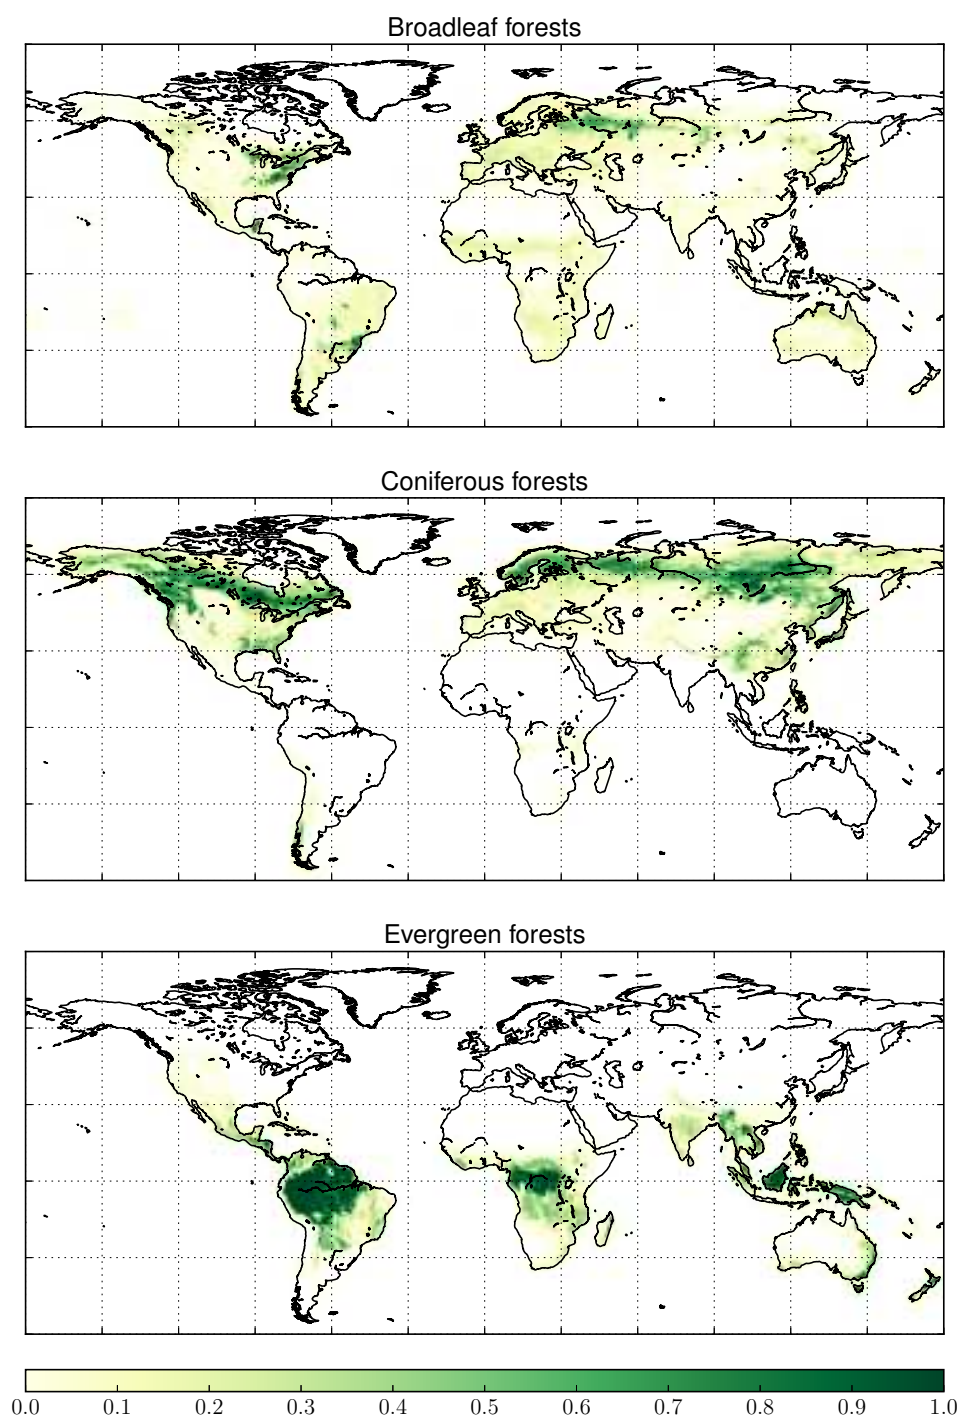

**Figure S1.** Cover fraction of broadleaf, coniferous and evergreen forests.

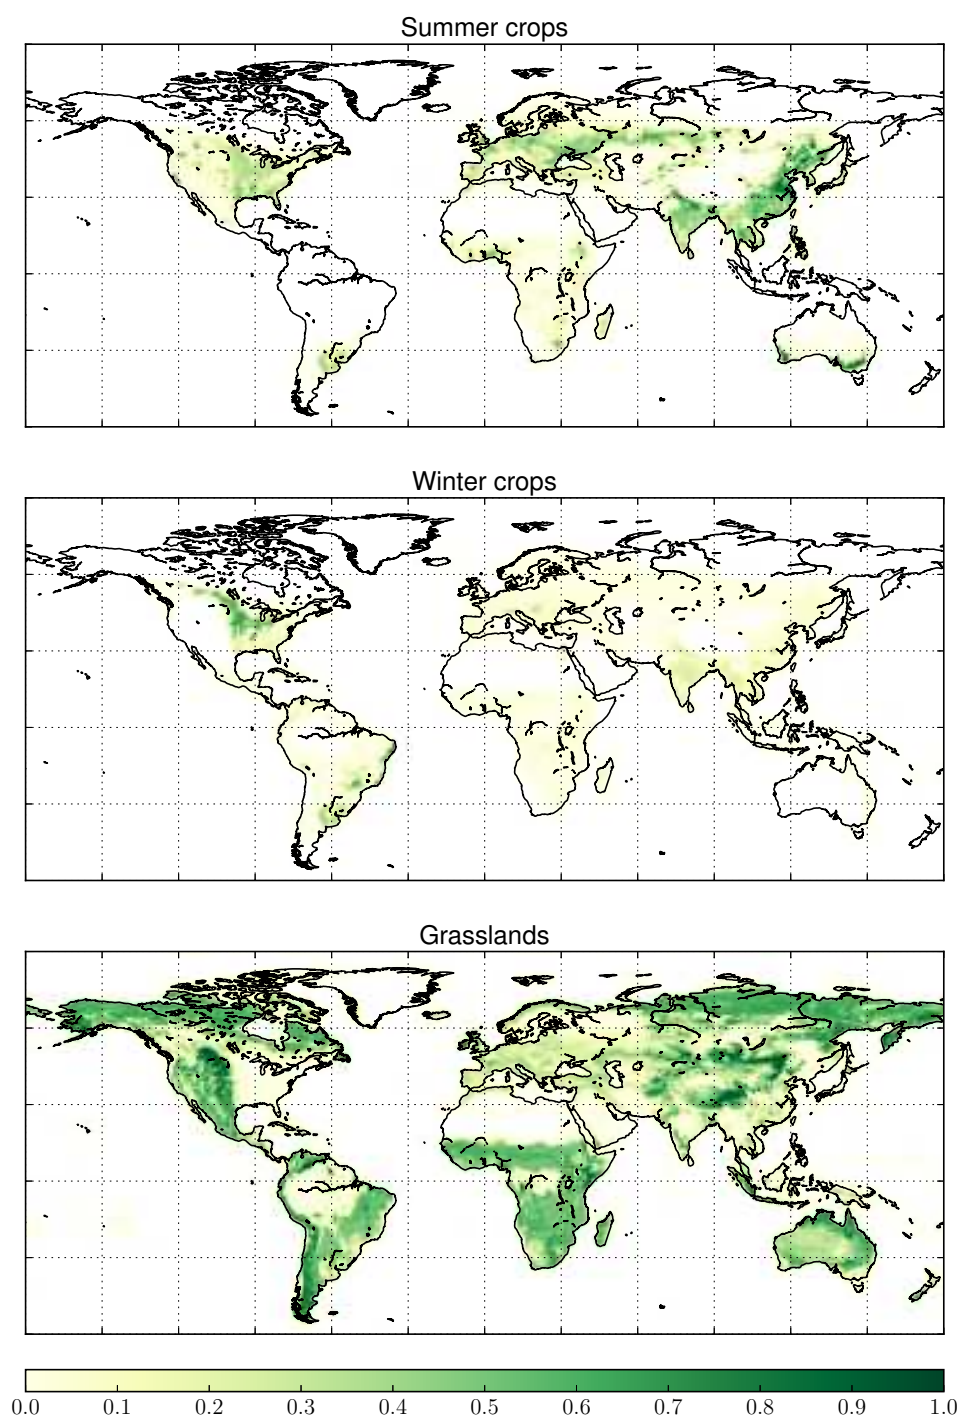

**Figure S2.** Cover fraction of summer crops, winter crops and grasslands.
